# Supplementary material for: Mechanism of the reduced shock sensitivity of CL-20/MTNP co-crystals from reactive molecular dynamics simulations
Source: Royal Society of Chemistry journal article supplement (doi:10.1039/d6ra01177b), 2026-04-13
Supplement: d6ra01177b1.pdf [file d6ra01177b1.pdf]

## Mechanism of the reduced shock sensitivity of CL-20/MTNP co-crystals from reactive molecular dynamics simulations

Fuping Wang\*, Guangyan Du, Huihan Zhang, Liufei Yang, Wanru Bi, Yiyang Li,

Yaowen Liu, Wenfang Hou, Songen Wang, Dongqiang Zhang

School of Chemistry and Material Science, Langfang Normal University, Langfang, 065000,  
China

\*Correspondence: [wangfuping@lfnu.edu.cn](mailto:wangfuping@lfnu.edu.cn)

### Supplementary Materials:

The earliest and most frequent elementary reactions occurring in CL-20/MTNP, CL-20, and MTNP crystals at an impact velocity of 3 km/s (Table S1) and 4 km/s (Table S2).

**Table S1** Earliest and most frequent elementary reactions in CL-20/MTNP, CL-20, and MTNP crystals at an impact velocity of 3 km/s

| Crystals       | Frequ<br>encies | Reaction<br>time(ps)                                          | Elementary reactions                                                                                                                           | Illustration |                      |
|----------------|-----------------|---------------------------------------------------------------|------------------------------------------------------------------------------------------------------------------------------------------------|--------------|----------------------|
| CL-20/<br>MTNP | 3               | 0.2-0.2                                                       | $C_4H_3N_5O_6 \rightarrow C_4H_3N_5O_6-M(C_6H_6N_{12}O_{12})$                                                                                  | First occur  |                      |
|                | 6               | 0.3-0.3                                                       | $C_6H_6N_{12}O_{12} \rightarrow C_6H_6N_{12}O_{12}-M(C_{10}H_9N_{17}O_{18})$                                                                   |              |                      |
|                | 2               | 0.3-0.3                                                       | $C_4H_3N_5O_6-M(C_6H_6N_{12}O_{12})+C_6H_6N_{12}O_{12} \rightarrow C_{10}H_9N_{17}O_{18}-M(C_6H_6N_{12}O_{12})$                                |              |                      |
|                | 1               | 0.3-0.3                                                       | $C_4H_3N_5O_6+C_6H_6N_{12}O_{12}-M(C_{10}H_9N_{17}O_{18}) \rightarrow C_{10}H_9N_{17}O_{18}-M(C_{34}H_{30}N_{56}O_{60})$                       |              |                      |
|                | 1               | 0.3-0.3                                                       | $C_4H_3N_5O_6+C_6H_6N_{12}O_{12}+C_6H_6N_{12}O_{12}-M(C_{10}H_9N_{17}O_{18}) \rightarrow C_{16}H_{15}N_{29}O_{30}-M(C_{20}H_{18}N_{33}O_{33})$ |              |                      |
|                | 1               | 0.4-0.4                                                       | $C_{10}H_9N_{17}O_{18}-M(C_6H_6N_{12}O_{12}) \rightarrow C_{10}H_9N_{17}O_{18}-M(C_{14}H_{12}N_{22}O_{24})$                                    |              |                      |
|                | 3               | 0.4-0.4                                                       | $C_6H_6N_{12}O_{12} \rightarrow C_6H_6N_{12}O_{12}-M(C_4H_3N_5O_6)$                                                                            |              |                      |
|                | 1               | 0.4-0.4                                                       | $C_{16}H_{15}N_{29}O_{30}-M(C_{20}H_{18}N_{33}O_{33}) \rightarrow C_{10}H_9N_{17}O_{18}+C_6H_6N_{12}O_{12}$                                    |              |                      |
|                | 6               | 0.4-1.6                                                       | $C_6H_6N_{12}O_{12} \rightarrow C_6H_6N_{12}O_{12}-M(C_{10}H_9N_{17}O_{18})$                                                                   |              |                      |
|                | 6               | 1.4-6.3                                                       | $NO_2+NO_2 \rightarrow N_2O_4$                                                                                                                 |              |                      |
|                | 4               | 5.0-7.6                                                       | $N_2O_5 \rightarrow NO_2+NO_3$                                                                                                                 |              |                      |
|                | 3               | 0.9-2.3                                                       | $C_6H_6N_{12}O_{12}-M(C_{10}H_9N_{17}O_{18}) \rightarrow C_6H_6N_{12}O_{12}$                                                                   |              | Highest<br>frequency |
|                | 3               | 0.8-1.4                                                       | $C_6H_6N_{12}O_{12}-M(C_4H_3N_5O_6) \rightarrow C_6H_6N_{12}O_{12}$                                                                            |              |                      |
|                | 3               | 0.6-1.3                                                       | $C_6H_6N_{12}O_{12} \rightarrow C_6H_6N_{12}O_{12}-M(C_4H_3N_5O_6)$                                                                            |              |                      |
| 3              | 0.3-1.2         | $C_4H_3N_5O_6 \rightarrow C_4H_3N_5O_6-M(C_6H_6N_{12}O_{12})$ |                                                                                                                                                |              |                      |
| 3              | 1.9-5.0         | $N_2O_4 \rightarrow NO_2+NO_2$                                |                                                                                                                                                |              |                      |
| CL-20          | 1               | 0.2-0.2                                                       | $C_6H_6N_{12}O_{12} \rightarrow C_6H_6N_{12}O_{12}-M(C_6H_6N_{12}O_{12})$                                                                      | First occur  |                      |
|                | 1               | 0.3-0.3                                                       | $C_6H_6N_{12}O_{12}+C_6H_6N_{12}O_{12} \rightarrow C_{12}H_{12}N_{24}O_{24}-M(C_{48}H_{49}N_{96}O_{91})$                                       |              |                      |
|                | 1               | 0.3-0.3                                                       | $C_6H_6N_{12}O_{12}+C_6H_6N_{12}O_{12}+C_6H_6N_{12}O_{12} \rightarrow C_{18}H_{18}N_{36}O_{36}-M(C_{30}H_{29}N_{59}O_6)$                       |              |                      |

|      |   |         |                                                                                                                                                                          |                   |
|------|---|---------|--------------------------------------------------------------------------------------------------------------------------------------------------------------------------|-------------------|
|      | 1 | 0.3-0.3 | $C_6H_6N_{12}O_{12}+C_6H_6N_{12}O_{12}+C_6H_6N_{12}O_{12}+C_6H_6N_{12}O_{12}-M(C_6H_6N_{12}O_{12})\rightarrow$<br>$C_{24}H_{24}N_{48}O_{48}-M(C_{24}H_{23}N_{43}O_{43})$ |                   |
|      | 1 | 0.4-0.4 | $C_{24}H_{24}N_{48}O_{48}-M(C_{24}H_{23}N_{43}O_{43})\rightarrow C_{18}H_{18}N_{36}O_{36}-M(C_{36}H_{35}N_{66}O_{64})+C_6H_6N_{12}O_{12}-M(C_6H_6N_{12}O_{12})$          |                   |
|      | 1 | 0.4-0.4 | $C_{18}H_{18}N_{36}O_{36}-M(C_{30}H_{29}N_{59}O_{62})\rightarrow C_{12}H_{12}N_{24}O_{24}-M(C_{42}H_{40}N_{81}O_{79})+C_6H_6N_{12}O_{12}-M(C_6H_6N_{12}O_{12})$          |                   |
|      | 1 | 0.4-0.4 | $C_{18}H_{18}N_{36}O_{36}-M(C_{30}H_{29}N_{56}O_{56})\rightarrow C_{12}H_{12}N_{24}O_{24}-M(C_{54}H_{53}N_{101}O_{98})+C_6H_6N_{12}O_{12}-M(C_6H_6N_{12}O_{12})$         |                   |
|      | 1 | 0.4-0.4 | $C_{12}H_{12}N_{24}O_{24}-M(C_{48}H_{49}N_{96}O_{91})\rightarrow C_6H_6N_{12}O_{12}-M(C_{12}H_{12}N_{24}O_{24})+C_6H_6N_{12}O_{12}-M(C_6H_6N_{12}O_{12})$                |                   |
|      | 4 | 5.8-8.1 | $NO_2-M(NO_3)+N_2\rightarrow N_3O_2-M(NO_3)$                                                                                                                             |                   |
|      | 3 | 5.9-8.2 | $N_3O_2-M(NO_3)\rightarrow NO_2-M(NO_3)+N_2$                                                                                                                             |                   |
|      | 2 | 8.1-9.2 | $HO\rightarrow HO-M(NO_2)$                                                                                                                                               |                   |
|      | 2 | 7.5-8.1 | $N-M(HN_2O)\rightarrow N-M(N_2)$                                                                                                                                         |                   |
|      | 2 | 7.4-7.6 | $N-M(N_2)\rightarrow N-M(HN_2O)$                                                                                                                                         |                   |
|      | 2 | 7.3-7.6 | $NO_2-M(O)+N_2\rightarrow N_3O_2-M(O)$                                                                                                                                   | Highest frequency |
|      | 2 | 6.2-8.6 | $HO\rightarrow HO-M(N_2)$                                                                                                                                                |                   |
|      | 2 | 5.8-6.1 | $O-M(O)+NO\rightarrow NO_2-M(O)$                                                                                                                                         |                   |
|      | 2 | 5.7-5.9 | $NO_2-M(O)\rightarrow O-M(O)+NO$                                                                                                                                         |                   |
|      | 2 | 1.6-2.2 | $NO_2-M(NO_2)\rightarrow NO_2-M(N_2O_4)$                                                                                                                                 |                   |
|      | 2 | 1.6-1.9 | $NO_2\rightarrow NO_2-M(NO_2)$                                                                                                                                           |                   |
|      | 2 | 1.5-2.1 | $NO_2-M(N_2O_4)\rightarrow NO_2-M(NO_2)$                                                                                                                                 |                   |
|      | 6 | 0.3-0.5 | $C_4H_3N_5O_6\rightarrow C_4H_3N_5O_6-M(C_4H_3N_5O_6)$                                                                                                                   |                   |
|      | 2 | 0.4-0.6 | $C_4H_3N_5O_6-M(C_4H_3N_5O_6)\rightarrow C_4H_3N_5O_6$                                                                                                                   |                   |
|      | 1 | 0.4     | $C_4H_3N_5O_6+C_4H_3N_5O_6-M(C_4H_3N_5O_6)\rightarrow C_8H_6N_{10}O_{12}-M(C_8H_6N_{10}O_{12})$                                                                          | First occur       |
|      | 1 | 0.4     | $C_4H_3N_5O_6+C_4H_3N_5O_6-M(C_4H_3N_5O_6)\rightarrow C_8H_6N_{10}O_{12}-M(C_4H_3N_5O_6)$                                                                                |                   |
|      | 1 | 0.4     | $C_4H_3N_5O_6+C_4H_3N_5O_6\rightarrow C_8H_6N_{10}O_{12}-M(C_{55}H_{37}N_{62}O_{74})$                                                                                    |                   |
| MTNP | 1 | 0.4     | $C_4H_3N_5O_6+C_4H_3N_5O_6\rightarrow C_8H_6N_{10}O_{12}$                                                                                                                |                   |
|      | 6 | 0.3-0.5 | $C_4H_3N_5O_6\rightarrow C_4H_3N_5O_6-M(C_4H_3N_5O_6)$                                                                                                                   |                   |
|      | 3 | 4.4-5.5 | $NO_2\rightarrow NO_2-M(C_4H_3N_5O_6)$                                                                                                                                   | Highest frequency |
|      | 2 | 0.9-1.1 | $C_7H_3N_{10}O_{12}\rightarrow C_3N_5O_7+C_4H_3N_5O_5$                                                                                                                   |                   |
|      | 2 | 7.1-9.0 | $NO_2\rightarrow NO_2-M(NO_2)$                                                                                                                                           |                   |
|      | 2 | 0.4-0.6 | $C_4H_3N_5O_6-M(C_4H_3N_5O_6)\rightarrow C_4H_3N_5O_6$                                                                                                                   |                   |

**Table S2** Earliest and most frequent elementary reactions in CL-20/MTNP, CL-20, and MTNP crystals at an impact velocity of 4 km/s

| Crystals       | Frequencies | Reaction time(ps)                   | Elementary reactions                                                                                                                                                                                                                                                                                                                                                                                                                                                                    | Illustration      |
|----------------|-------------|-------------------------------------|-----------------------------------------------------------------------------------------------------------------------------------------------------------------------------------------------------------------------------------------------------------------------------------------------------------------------------------------------------------------------------------------------------------------------------------------------------------------------------------------|-------------------|
| CL-20/<br>MTNP | 1           | 0.2-0.2                             | $C_4H_3N_5O_6 + C_4H_3N_5O_6 + C_6H_6N_{12}O_{12} + C_6H_6N_{12}O_{12} + C_6H_6N_{12}O_{12} + C_6H_6N_{12}O_{12} \rightarrow C_{32}H_{30}N_{58}O_{60} - M(C_{142}H_{130}N_{242}O_{251})$                                                                                                                                                                                                                                                                                                |                   |
|                | 1           | 0.3-0.3                             | $C_{32}H_{30}N_{58}O_{60} - M(C_{142}H_{130}N_{242}O_{251}) + C_6H_6N_{12}O_{12} + C_6H_6N_{12}O_{12} + C_6H_6N_{12}O_{12} + C_6H_6N_{12}O_{12} \rightarrow C_{12}H_{12}N_{24}O_{24} - M(C_{10}H_9N_{17}O_{18}) + C_{12}H_{12}N_{24}O_{24} - M(C_{14}H_{12}N_{22}O_{23}) + C_{16}H_{15}N_{29}O_{30} - M(C_{117}H_{107}N_{193}O_{191}) + C_{16}H_{15}N_{29}O_{30} - M(C_6H_6N_{12}O_{11})$                                                                                               |                   |
|                | 1           | 0.4-0.4                             | $C_{16}H_{15}N_{29}O_{30} - M(C_6H_6N_{12}O_{11}) \rightarrow NO_2 + C_{10}H_9N_{16}O_{17} - M(C_{10}H_9N_{17}O_{20}) + C_6H_6N_{12}O_{11}$                                                                                                                                                                                                                                                                                                                                             | First occur       |
|                | 1           | 0.4-0.4                             | $C_{16}H_{15}N_{29}O_{30} - M(C_{117}H_{107}N_{193}O_{191}) \rightarrow O - M(C_4H_3N_5O_6) + CH_3N_2O + C_{15}H_{12}N_{27}O_{28} - M(C_{137}H_{121}N_{224}O_{218})$                                                                                                                                                                                                                                                                                                                    |                   |
|                | 1           | 0.4-0.4                             | $C_{12}H_{12}N_{24}O_{24} - M(C_{10}H_9N_{17}O_{18}) + C_{12}H_{12}N_{24}O_{24} - M(C_{14}H_{12}N_{22}O_{23}) + C_4H_3N_5O_6 \rightarrow O - M(C_{20}H_{18}N_{34}O_{35}) + 2O_2 + NO_2 + C_{16}H_{15}N_{28}O_{25} - M(C_4H_3N_5O_6) + C_6H_6N_{12}O_{11} + C_6H_6N_{12}O_{11} - M(C_4H_3N_5O_6)$                                                                                                                                                                                        |                   |
|                | 13          | 4.3-9.8                             | $N_2 - M(H) \rightarrow N_2$                                                                                                                                                                                                                                                                                                                                                                                                                                                            | Highest frequency |
|                | 13          | 4.2-9.2                             | $N_2 \rightarrow N_2 - M(H)$                                                                                                                                                                                                                                                                                                                                                                                                                                                            |                   |
|                | 11          | 5.1-9.8                             | $N_2 \rightarrow N_2 - M(HO)$                                                                                                                                                                                                                                                                                                                                                                                                                                                           |                   |
|                | 11          | 5.0-9.7                             | $N - M(N) \rightarrow N - M(HN)$                                                                                                                                                                                                                                                                                                                                                                                                                                                        |                   |
|                | 10          | 3.1-9.9                             | $N_2 - M(HO) \rightarrow N_2$                                                                                                                                                                                                                                                                                                                                                                                                                                                           |                   |
| 8              | 5.1-9.4     | $O - M(H_2) \rightarrow O - M(H_2)$ |                                                                                                                                                                                                                                                                                                                                                                                                                                                                                         |                   |
| 8              | 4.0-9.8     | $O - M(H_2) \rightarrow O - M(H)$   |                                                                                                                                                                                                                                                                                                                                                                                                                                                                                         |                   |
| CL-20          | 1           | 0.2-0.2                             | $C_6H_6N_{12}O_{12} + C_6H_6N_{12}O_{12} \rightarrow C_{12}H_{12}N_{24}O_{24}$                                                                                                                                                                                                                                                                                                                                                                                                          |                   |
|                | 7           | 0.2-0.3                             | $C_6H_6N_{12}O_{12} \rightarrow C_6H_6N_{12}O_{12} - M(C_6H_6N_{12}O_{12})$                                                                                                                                                                                                                                                                                                                                                                                                             |                   |
|                | 1           | 0.3-0.3                             | $C_6H_6N_{12}O_{12} \rightarrow C_6H_6N_{12}O_{12} - M(C_{12}H_{12}N_{24}O_{24})$                                                                                                                                                                                                                                                                                                                                                                                                       |                   |
|                | 1           | 0.3-0.3                             | $C_{12}H_{12}N_{24}O_{24} + C_6H_6N_{12}O_{12} - M(C_6H_6N_{12}O_{12}) + C_6H_6N_{12}O_{12} - M(C_6H_6N_{12}O_{12}) + C_6H_6N_{12}O_{12} - M(C_6H_6N_{12}O_{12}) \rightarrow O - M(O) + NO_2 + C_{30}H_{30}N_{59}O_{57}(C_6H_6N_{12}O_{12} + C_6H_6N_{12}O_{12} + C_{18}H_{18}N_{35}O_{33}) - M(C_{176}H_{174}N_{330}O_{308})$                                                                                                                                                          | First occur       |
|                | 1           | 0.4-0.4                             | $C_6H_6N_{12}O_{12} \rightarrow NO_2 + C_6H_6N_{11}O_{10}$                                                                                                                                                                                                                                                                                                                                                                                                                              |                   |
|                | 1           | 0.4-0.4                             | $C_{30}H_{30}N_{59}O_{57}(C_6H_6N_{12}O_{12} + C_6H_6N_{12}O_{12} + C_{18}H_{18}N_{35}O_{33}) - M(C_{176}H_{174}N_{330}O_{308}) + C_6H_6N_{12}O_{12} + C_6H_6N_{12}O_{12} - M(C_{12}H_{12}N_{24}O_{24}) + C_6H_6N_{12}O_{12} - M(C_6H_6N_{12}O_{12}) + C_6H_6N_{12}O_{12} - M(C_6H_6N_{12}O_{12}) + C_6H_6N_{12}O_{12} - M(C_6H_6N_{12}O_{12}) \rightarrow 4NO_2 + C_{18}H_{18}N_{33}O_{30} - M(C_{12}H_{12}N_{25}O_{25}) + C_{48}H_{48}N_{94}O_{91} - M(C_{252}H_{242}N_{478}O_{449})$ |                   |
|                | 1           | 0.4-0.4                             | $O - M(O) \rightarrow O - M(C_6H_8N_{11}O_9)$                                                                                                                                                                                                                                                                                                                                                                                                                                           |                   |
| 19             | 2.1-9.9     | $N_2 \rightarrow N_2 - M(H)$        | Highest frequency                                                                                                                                                                                                                                                                                                                                                                                                                                                                       |                   |
| 18             | 2.2-9.1     | $N_2 - M(H) \rightarrow N_2$        |                                                                                                                                                                                                                                                                                                                                                                                                                                                                                         |                   |
| 14             | 3-9.9       | $N - M(N) \rightarrow N - M(HN)$    |                                                                                                                                                                                                                                                                                                                                                                                                                                                                                         |                   |
| 13             | 2.8-9.7     | $N_2 - M(HO) \rightarrow N_2$       |                                                                                                                                                                                                                                                                                                                                                                                                                                                                                         |                   |
| 11             | 2.7-9.6     | $N_2 \rightarrow N_2 - M(HO)$       |                                                                                                                                                                                                                                                                                                                                                                                                                                                                                         |                   |

|      |         |                                      |                                                                                                                                                                                                                                                                                                                                                                                                                                                                                                                                                                                                                                                                                                                                                                                                                                                                                                                                                                                                                                                                                                                                                                                                                                                     |             |
|------|---------|--------------------------------------|-----------------------------------------------------------------------------------------------------------------------------------------------------------------------------------------------------------------------------------------------------------------------------------------------------------------------------------------------------------------------------------------------------------------------------------------------------------------------------------------------------------------------------------------------------------------------------------------------------------------------------------------------------------------------------------------------------------------------------------------------------------------------------------------------------------------------------------------------------------------------------------------------------------------------------------------------------------------------------------------------------------------------------------------------------------------------------------------------------------------------------------------------------------------------------------------------------------------------------------------------------|-------------|
|      | 11      | 2.7-9.5                              | <b>N-M(HN)</b> →N-M(N)                                                                                                                                                                                                                                                                                                                                                                                                                                                                                                                                                                                                                                                                                                                                                                                                                                                                                                                                                                                                                                                                                                                                                                                                                              |             |
|      | 10      | 2.7-9.4                              | <b>O-M(H<sub>2</sub>)</b> →O-M(H)                                                                                                                                                                                                                                                                                                                                                                                                                                                                                                                                                                                                                                                                                                                                                                                                                                                                                                                                                                                                                                                                                                                                                                                                                   |             |
| MTNP | 3       | 0.2-0.3                              | <b>C<sub>4</sub>H<sub>3</sub>N<sub>5</sub>O<sub>6</sub></b> → <b>C<sub>4</sub>H<sub>3</sub>N<sub>5</sub>O<sub>6</sub>-M(C<sub>4</sub>H<sub>3</sub>N<sub>5</sub>O<sub>6</sub>)</b>                                                                                                                                                                                                                                                                                                                                                                                                                                                                                                                                                                                                                                                                                                                                                                                                                                                                                                                                                                                                                                                                   |             |
|      | 1       | 0.2-0.2                              | C <sub>4</sub> H <sub>3</sub> N <sub>5</sub> O <sub>6</sub> →C <sub>4</sub> H <sub>3</sub> N <sub>5</sub> O <sub>6</sub> -M(C <sub>7</sub> H <sub>4</sub> N <sub>9</sub> O <sub>10</sub> )                                                                                                                                                                                                                                                                                                                                                                                                                                                                                                                                                                                                                                                                                                                                                                                                                                                                                                                                                                                                                                                          |             |
|      | 1       | 0.2-0.2                              | C <sub>4</sub> H <sub>3</sub> N <sub>5</sub> O <sub>6</sub> +C <sub>4</sub> H <sub>3</sub> N <sub>5</sub> O <sub>6</sub> →C <sub>8</sub> H <sub>6</sub> N <sub>10</sub> O <sub>12</sub> -M(C <sub>7</sub> H <sub>5</sub> N <sub>8</sub> O <sub>9</sub> )                                                                                                                                                                                                                                                                                                                                                                                                                                                                                                                                                                                                                                                                                                                                                                                                                                                                                                                                                                                            |             |
|      | 1       | 0.2-0.2                              | C <sub>4</sub> H <sub>3</sub> N <sub>5</sub> O <sub>6</sub> +C <sub>4</sub> H <sub>3</sub> N <sub>5</sub> O <sub>6</sub> →C <sub>8</sub> H <sub>6</sub> N <sub>10</sub> O <sub>12</sub> -M(C <sub>65</sub> H <sub>43</sub> N <sub>75</sub> O <sub>97</sub> )                                                                                                                                                                                                                                                                                                                                                                                                                                                                                                                                                                                                                                                                                                                                                                                                                                                                                                                                                                                        |             |
|      | 1       | 0.3-0.3                              | C <sub>4</sub> H <sub>3</sub> N <sub>5</sub> O <sub>6</sub> -M(C <sub>7</sub> H <sub>4</sub> N <sub>9</sub> O <sub>10</sub> )→C <sub>4</sub> H <sub>3</sub> N <sub>5</sub> O <sub>6</sub>                                                                                                                                                                                                                                                                                                                                                                                                                                                                                                                                                                                                                                                                                                                                                                                                                                                                                                                                                                                                                                                           | First occur |
|      | 1       | 0.3-0.3                              | C <sub>4</sub> H <sub>3</sub> N <sub>5</sub> O <sub>6</sub> +C <sub>4</sub> H <sub>3</sub> N <sub>5</sub> O <sub>6</sub> -M(C <sub>4</sub> H <sub>3</sub> N <sub>5</sub> O <sub>6</sub> )+C <sub>4</sub> H <sub>3</sub> N <sub>5</sub> O <sub>6</sub> -M(C <sub>4</sub> H <sub>3</sub> N <sub>5</sub> O <sub>6</sub> )+C <sub>8</sub> H <sub>6</sub> N <sub>10</sub> O <sub>12</sub> -M(C <sub>65</sub> H <sub>43</sub> N <sub>75</sub> O <sub>97</sub> )+C <sub>8</sub> H <sub>6</sub> N <sub>10</sub> O <sub>12</sub> -M(C <sub>7</sub> H <sub>5</sub> N <sub>8</sub> O <sub>9</sub> )→C <sub>16</sub> H <sub>12</sub> N <sub>20</sub> O <sub>24</sub> -M(C <sub>23</sub> H <sub>16</sub> N <sub>27</sub> O <sub>30</sub> )+C <sub>36</sub> H <sub>27</sub> N <sub>45</sub> O <sub>54</sub> -M(C <sub>104</sub> H <sub>78</sub> N <sub>125</sub> O <sub>155</sub> ) |             |
|      | 1       | 0.4-0.4                              | C <sub>6</sub> H <sub>6</sub> N <sub>12</sub> O <sub>12</sub> →C <sub>6</sub> H <sub>6</sub> N <sub>12</sub> O <sub>12</sub> -M(C <sub>4</sub> H <sub>3</sub> N <sub>5</sub> O <sub>6</sub> )                                                                                                                                                                                                                                                                                                                                                                                                                                                                                                                                                                                                                                                                                                                                                                                                                                                                                                                                                                                                                                                       |             |
|      | 13      | 3.7-9.7                              | <b>N-M(HN)</b> →N-M(N)                                                                                                                                                                                                                                                                                                                                                                                                                                                                                                                                                                                                                                                                                                                                                                                                                                                                                                                                                                                                                                                                                                                                                                                                                              |             |
|      | 11      | 3.6-9.7                              | N-M(N)→N-M(HN)                                                                                                                                                                                                                                                                                                                                                                                                                                                                                                                                                                                                                                                                                                                                                                                                                                                                                                                                                                                                                                                                                                                                                                                                                                      |             |
|      | 10      | 2.1-9.1                              | <b>N<sub>2</sub>-M(H)</b> →N <sub>2</sub>                                                                                                                                                                                                                                                                                                                                                                                                                                                                                                                                                                                                                                                                                                                                                                                                                                                                                                                                                                                                                                                                                                                                                                                                           |             |
| 8    | 2.3-8.6 | <b>O-M(H<sub>2</sub>)</b> →O-M(H)    | Highest frequency                                                                                                                                                                                                                                                                                                                                                                                                                                                                                                                                                                                                                                                                                                                                                                                                                                                                                                                                                                                                                                                                                                                                                                                                                                   |             |
| 8    | 2.4-9.7 | N <sub>2</sub> →N <sub>2</sub> -M(H) |                                                                                                                                                                                                                                                                                                                                                                                                                                                                                                                                                                                                                                                                                                                                                                                                                                                                                                                                                                                                                                                                                                                                                                                                                                                     |             |
| 6    | 3.6-9.9 | N <sub>2</sub> -M(HO)→N <sub>2</sub> |                                                                                                                                                                                                                                                                                                                                                                                                                                                                                                                                                                                                                                                                                                                                                                                                                                                                                                                                                                                                                                                                                                                                                                                                                                                     |             |
| 6    | 4.0-8.8 | O-M(H)→O-M(H <sub>2</sub> )          |                                                                                                                                                                                                                                                                                                                                                                                                                                                                                                                                                                                                                                                                                                                                                                                                                                                                                                                                                                                                                                                                                                                                                                                                                                                     |             |
